# Anatomical Correlates of Cognitive Functions in Early Parkinson's Disease Patients

Roberta Biundo<sup>1\*</sup>, Massimiliano Calabrese<sup>2</sup>, Luca Weis<sup>1</sup>, Silvia Facchini<sup>1</sup>, Gianluigi Ricchieri<sup>2</sup>, Paolo Gallo<sup>3</sup>, Angelo Antonini<sup>1</sup>

<sup>1</sup> Department for Parkinson's Disease, "Fondazione Ospedale San Camillo," I.R.C.C.S., Venice, Italy, <sup>2</sup> La Clinica Neurologica, A.O. Universitaria, Padova, Italy, <sup>3</sup> Department of Neurosciences SnpSRR, Neurology Clinic St Anthony Hospital, University of Padua, Padua, Italy

## Abstract

**Background:** Cognitive deficits may occur early in Parkinson's disease (PD) but the extent of cortical involvement associated with cognitive dysfunction needs additional investigations. The aim of our study is to identify the anatomical pattern of cortical thickness alterations in patients with early stage PD and its relationship with cognitive disability.

**Methods:** We recruited 29 PD patients and 21 healthy controls. All PD patients performed an extensive neuropsychological examination and 14 were diagnosed with mild cognitive impairment (PD-MCI). Surface-based cortical thickness analysis was applied to investigate the topographical distribution of cortical and subcortical alterations in early PD compared with controls and to assess the relationship between cognition and regional cortical changes in PD-MCI.

**Results:** Overall PD patients showed focal cortical (occipital-parietal areas, orbito-frontal and olfactory areas) and subcortical thinning when compared with controls. PD-MCI showed a wide spectrum of cognitive deficits and related significant regional thickening in the right parietal-frontal as well as in the left temporal-occipital areas.

**Conclusion:** Our results confirm the presence of changes in grey matter thickness at relatively early PD stage and support previous studies showing thinning and atrophy in the neocortex and subcortical regions. Relative cortical thickening in PD-MCI may instead express compensatory neuroplasticity. Brain reserve mechanisms might first modulate cognitive decline during the initial stages of PD.

**Citation:** Biundo R, Calabrese M, Weis L, Facchini S, Ricchieri G, et al. (2013) Anatomical Correlates of Cognitive Functions in Early Parkinson's Disease Patients. PLoS ONE 8(5): e64222. doi:10.1371/journal.pone.0064222

**Editor:** Bogdan Draganski, Centre Hospitalier Universitaire Vaudois Lausanne - CHUV, UNIL, Switzerland

**Received:** January 18, 2013; **Accepted:** April 12, 2013; **Published:** May 22, 2013

**Copyright:** © 2013 Biundo et al. This is an open-access article distributed under the terms of the Creative Commons Attribution License, which permits unrestricted use, distribution, and reproduction in any medium, provided the original author and source are credited.

**Funding:** The authors have no support or funding to report.

**Competing Interests:** The authors have declared that no competing interests exist.

\* E-mail: roberta.biundo@ospedalesancamillo.net

## Introduction

The contribution of frontostriatal dysfunction to cognitive abnormalities in Parkinson's disease (PD) has been extensively investigated [1]. Recently, it has emerged that PD patients show a wide and variable spectrum of cognitive deficits involving multiple domains like memory, visuo-spatial and less frequently language, which are underlined by variable neuroanatomical substrates [2–8]. Imaging studies, using voxel-based morphometry (VBM) revealed regional brain atrophy in PD (with and without cognitive deficits) compared with healthy control. In particular visuo-spatial and visuo-perceptive impairment was associated with atrophy in temporo-parietal regions [4] while memory deficits were linked with hippocampal atrophy in patients with visual hallucinations and dementia [9]. Others studies found frontal-temporal and parietal cortex atrophy also in non-demented PD [10–13]. However, VBM may be insufficient to detect early anatomical changes mainly because of technical limits such as inadequate definition of grey matter intensity, surface area and cortical folding patterns. The recent introduction of the surface-based cortical thickness analysis may partially minimize these problems [14] and provide complementary information to VBM in exploring the

topography of brain cortical changes. Only a few studies are available in PD and each has significant limitations particularly in respect to the extent of neuropsychological assessment.

In our study we measured cortical thickness with brain MRI and used an extensive cognitive assessment in a cohort of PD patients and healthy controls. We aimed at identifying regional structural changes that best characterize PD and at investigating the relationship between regional cortical alterations and cognitive abnormalities.

## Methods

### Participants

We recruited all participants from a database build up between December 2010 and December 2011 at the Parkinson's disease Unit of the 'San Camillo' Hospital (Venice Lido, Italy) and at the Neurology Clinic of the University Hospital of Padua, Italy. We included all non-demented PD patients according to published diagnostic criteria for PD and PD-dementia [15–16] who underwent an extensive neuropsychological battery and had the same MRI scan protocol (3D sequences made with the same machine). We only considered PD patients who were on stable

medications and did not report motor fluctuations. We did not include subjects with significant cardiovascular problems and history of major psychiatric disorders (i.e. bipolar disorder or major depression). Further, we excluded patients with atypical Parkinsonism and PD who had neurosurgical procedures (including deep brain stimulation). Finally we discarded scans from individuals who had movement artefacts and significant white matter hypo-intensity. Our population consisted of total 29 patients and 21 healthy controls remained. L-dopa equivalent daily dose (LEDD) and/or dopamine agonist daily dose (DAED) for each patient was calculated as previously published [17]. We collected demographic data (age, gender and education level) and clinical details (age at onset and disease duration). All PD patients had asymmetric symptoms onset (17 in the right and 10 in the left body side) except for 2 patients with bilateral symptoms at the onset. The severity of extrapyramidal symptoms was graded using the Hoehn and Yahr (H&Y). The mean H&Y score was 1.6 (SD 0.6) (12 patients had a score of 1, 3 had a score of 1.5, 11 had a score of 2, 1 had a score of 2.5 and 2 had a score of 3). Written informed consent was obtained from all participants after the nature of the study was fully explained. The study was approved by the ethic committee of the IRCCS San Camillo, Venice, Italy.

### Neuropsychological examination

Neuropsychological evaluation included the Mini Mental State Examination (MMSE) [18] for general cognitive functions, the Frontal Assessment Battery (FAB) for frontal functioning [19], the Category and Letter fluency tasks to evaluate response generation and maintenance of task instruction in working memory [20–21], tests of short and long term memory (RVLT, Digit Span Forward and Backwards and ROCF immediate recall) verbal and non verbal [22–23], tests of visual-spatial planning and attention such as the Rey-Osterrieth Complex Figure Test (ROCF) (copy and immediate recall) and Digit Cancellation [22–23], the Stroop Color/Word Interference Test to evaluate response monitoring and conflict resolution [24], the Trail Making Test part A to assess visual scanning, numeric sequencing and visual-motor speed (TMT-A), part B to assess general frontal lobe dysfunction (TMT-B) and the time differences between TMT-A and TMT-B (TMTB-A) to evaluate shifting abilities [25], clock drawing test (CDT) to evaluate semantic knowledge, planning and visual-spatial abilities [26] and drawing coping test (to assess visual-constructive abilities and constructional-apraxia respectively [22]). We used the Beck Depression scale (BDI-II) to assess presence of depression (range score 0–63) and measure severity of depressive symptoms. In addition all patients were interviewed for presence of hallucinations. Standardized, published normative datasets were used as comparative references to determine impairments. Tests were administered at the time of the scanning.

### Mild Cognitive Impairment definition

Diagnosis of mild cognitive impairment (MCI) was based on Movement Disorder Society task force recommendation criteria [27]. The following cognitive domains were considered: 1) attention/working memory abilities 2) executive abilities 3) visual-spatial abilities 4) memory and 5) language abilities. For each domain at least two tests were included. Its definition was based on performance in the five cognitive domains. To this end, raw individual test values were converted into Z-scores using relative Italian published normative data, corrected for age and education when possible. Patients performing  $\leq 1.5$  SD Z-score below the population mean in at least two tests for the same cognitive domain or one test in at least two different domains were classified as PD with mild cognitive impairment (PD-MCI).

### MRI acquisition and image processing

All images were acquired using a 1.5 T MR machine (Achieva, Philips Medical Systems, Best, The Netherlands) with 33 mT/m power gradient and a 16 channels head coil. No major hardware upgrades of the scanner occurred during the study period, and bimonthly quality assurance sessions took place to guarantee measurement stability. The following images were acquired from each subject: 1) *Fast fluid attenuated inversion recovery (FLAIR)*: repetition time (TR) = 10000 msec, echo time (TE) = 120 msec, inversion time (TI) = 2500 msec, echo train length (ETL) = 23, 50 contiguous axial slices with a thickness = 3.0 mm, a matrix size = 172 × 288, and a field of view (FOV) = 250 × 200 mm. 2) *Three 3D fast field echo (FFE) sequence*: 120 contiguous axial slices with TR = 25 msec, TE = 4.6 msec, flip angle = 30°, slice thickness = 1.2 mm, matrix = 256 × 256 and a FOV = 250 × 250 mm. All images were carefully inspected avoiding the presence of motion artefacts to ensure accurate identification of GM/WM boundary and the pial surface.

**Cortical thickness automatic parcellation:** The cortical thickness parcellation was carried out using Freesurfer toolkit (<http://surfer.nmr.mgh.harvard.edu/>) [28] with a surface-based approach performing the reconstruction of the brain surface from structural data [29]. The detailed procedure for the surface construction has been described and validated in previous publications [29–31]. Briefly the processing involved intensity normalisation, skull stripping, segmentation of white matter, tessellation of the grey/white matter boundary and automatic topology correction. This surface was then used as the starting point for a deformable surface algorithm to find the grey/white and grey/cerebrospinal fluid (CSF) surfaces. This method used both intensity and continuity information from the surfaces in the deformation procedures to produce representations of cortical thickness, calculated as the average of the closest distance from the grey/white boundary to the grey/CSF boundary and the grey/CSF boundary to the grey/white boundary at each vertex on the tessellated surface. After registration to a common surface template resulting from the surface-based averaging technique. The cortical thickness values were extracted from 74 labelled regions per hemisphere [32]. The automated anatomical labelling volume of interests (VOIs) corresponding to the Destrieux atlas regions as defined in Destrieux et al. [33] were created in the MNI standard space using the WFU-pickatlas 3.04 SPM8 tool. The 50 maps of cortical thickness were then created by an automated process obtained with a FSL 4.9 pipeline multiplying every Automated Anatomical Labelling (AAL) VOI by the corresponding cortical thickness value [modified method from Li G. et al. [34]].

**Cortical thickness group analysis:** A second level unpaired t-test group analysis was performed using a region by region voxel-based approach implemented in SPM8, masking for MNI standard GM Template. Four contrasts were analysed: PD vs. healthy controls (HC), PD without cognitive impairment (PD-CNT) vs. HC, PD-MCI vs. HC and PD-MCI vs. PD-CNT. Age and disease duration were included as covariates. Uncorrected p-value threshold of 0.05 was used. For each comparison the significant Cortical Thickness change was identified using Monte Carlo simulation in AlphaSim tool of Analysis of Functional NeuroImages (AFNI) software [35] at the individual voxel level of  $|t| > 2.0$  (df = 25,  $p < 0.05$ ) with a minimal cluster size of 716 contiguous voxels (3376  $\mu\text{l}$ ). This yielded a corrected alpha of  $p < 0.05$ . The obtained statistical 3D maps were then overlaid onto the MNI standard template by using the SPM8 visualization tool. Areas of significant difference that did not survive after correction are reported as significant trend.

**Analysis of subcortical volumes:** To analyse subcortical volumes obtained from Freesurfer anatomical parcellation we applied a Bonferroni correction.

**Statistical Analysis:** Clinical and demographic variables were analysed using Pearson Chi-square test to assess differences in the distribution of dichotomous variables. T-test and Kruskal-Wallis test was applied in order to assess differences for the continuous variables.

Pearson's  $r$  bivariate correlation analysis was run between areas of cortical alterations in PD-MCI and neuropsychological tests ( $z$  scores). All statistical analyses were performed using SPSS 20.0.

## Results

### Clinical

The whole PD group had a mean age of 60.6 years (SD 10.2), mean education of 10.44 (SD 4.6), mean disease duration of 5.6 (SD 5.2) and mean age of onset of 55.4 (SD 9.8). HC had a mean age of 54.8 (SD 4.7) and education of 10.7 (SD 4.1). No differences between PD and HC in gender ( $p=0.15$ ) and education ( $p=0.8$ ) were observed. However, age was significantly different ( $p<0.05$ ) and was used as covariate in all groups contrast. There were 14/29 PD-MCI patients. PD subgroups analysis showed that PD-CNT and PD-MCI did not differ for demographic or clinical variables (see table 1 for details).

### Cortical thickness analysis

**Whole PD group vs. HC:** There was a significant trend for PD cortical thinning in the following areas: in the right hemisphere, in the occipital superior area, in the cuneus and precuneus, in the superior orbito-frontal area, in the olfactory area and angular gyrus. In addition we found PD volume reductions in the putamen and nucleus accumbens bilaterally and in the right caudate, hippocampus, amygdala and pallidum. The right cuneus, hippocampus, amygdala and accumbens area were significant also after correction. No significant decrements were found in the HC when compared with PD group.

**PD-CNT vs. HC:** PD-CNT showed a significant trend for cortical thinning in the right hemisphere in the middle and superior orbito-frontal area, rectus, olfactory, fusiform and precuneus areas, paracentral lobule and cuneus area, superior occipital area, supramarginal area, as well as inferior parietal and angular area. In the left side we found cortical thinning in the occipital inferior area. All these areas with the exception of the supramarginal gyrus, rectus, fusiform, and angular areas remained

significant after correction. No areas of cortical thinning were found in the HC.

**PD-MCI vs. HC:** The following areas showed a significant trend of PD-MCI cortical thinning: cuneus, angular, fusiform and olfactory area, superior occipital area, superior temporal pole, middle orbito-frontal and supramarginal area in the right hemisphere. The cuneus and olfactory areas remained significant also after correction. No significant alterations were found in the HC.

**PD-MCI vs. PD-CNT:** Significant cortical thickening in PD-MCI was observed in the following regions: the superior and inferior parietal areas, precuneus, paracentral lobule, superior frontal areas and superior orbito-frontal area in the right side; the superior, middle and inferior temporal areas, the middle occipital area in the left side. All areas with the exception of the superior and middle temporal, and superior parietal areas were significant also after correction. There were no significant cortical thickness changes in PD-CNT.

Details of the analysis are shown in Tables 2, 3 and 4 and Figures 1 and 2.

**Table 1.** Demographic and clinical characteristics of PD subgroups.

|                      | PD-CNT (n = 15) | PD-MCI (n = 14) | P values |
|----------------------|-----------------|-----------------|----------|
| Gender (m/f)         | 10/5            | 7/7             | 0.38     |
| Age (y)              | 59.1(11)        | 62.1(9.5)       | 0.44     |
| Education (y)        | 11.3(5.3)       | 9.5(3.7)        | 0.38     |
| Disease Duration (y) | 5.8(5.3)        | 5.5(5.2)        | 0.91     |
| Age of onset (y)     | 54.4(10.9)      | 56.4(8.6)       | 0.81     |
| H&Y stage            | 1.6(0.7)        | 1.7(0.6)        | 0.59     |
| LEDD                 | 538.88(357.4)   | 652.55(342.9)   | 0.19     |
| DAED                 | 126.7(85.1)     | 139.35(82.2)    | 0.84     |
| BDI-II               | 6.3(5.7)        | 9.8(6.8)        | 0.09     |

doi:10.1371/journal.pone.0064222.t001

**Table 2.** Areas of cortical thinning in PD subgroups versus HC.

| ATROPHY         | AAL                        | T-value (Max) |
|-----------------|----------------------------|---------------|
| PD vs. HC       | Olfactory R                | 1,84          |
|                 | Frontal Superior Orbital R | 1,83          |
|                 | Occipital Superior R       | 1,85          |
|                 | Cuneus R                   | 2,71*         |
|                 | Angular R                  | 1,71          |
|                 | Precuneus R                | 1,7           |
| PD-CNT vs. HC   | Precuneus R                | 2,7*          |
|                 | Cuneus R                   | 2,58*         |
|                 | Angular R                  | 1,92          |
|                 | Parietal Inferior R        | 1,97*         |
|                 | Fusiform R                 | 1,84          |
|                 | Paracentral Lobule R       | 2,70*         |
|                 | Supramarginal R            | 1,75          |
|                 | Frontal Superior Orbital R | 2,66*         |
|                 | Rectus R                   | 1,91          |
|                 | Olfactory R                | 2,98*         |
| PD-MCI vs. HC   | Occipital Superior R       | 2,18*         |
|                 | Occipital Inferior L       | 2,16*         |
|                 | Cuneus R                   | 2,67*         |
|                 | Fusiform R                 | 1,7           |
|                 | Occipital Superior R       | 1,7           |
|                 | Temporal Pole Superior R   | 1,89          |
|                 | Frontal Middle Orbital R   | 1,74          |
|                 | Olfactory R                | 2,34*         |
| Supramarginal R | 2,35                       |               |
| Angular R       | 1,8                        |               |

\* = Cortical thickness comparison significant after AlphaSim threshold correction.

Remaining areas were not significant after correction and are reported as trend. doi:10.1371/journal.pone.0064222.t002

**Table 3.** Areas of cortical thickening in PD-MCI versus PD-CNT.

|               | AAL                        | T-value (Max) |
|---------------|----------------------------|---------------|
| PD-MCI>PD-CNT | Temporal Inferior L        | 2,09*         |
|               | Temporal Superior L        | 1,92          |
|               | Precuneus R                | 1,97*         |
|               | Paracentral Lobule R       | 2,24*         |
|               | Frontal Superior R         | 2,13*         |
|               | Frontal Superior Orbital R | 2,21*         |
|               | Temporal Pole Middle L     | 1,92          |
|               | Occipital Middle L         | 2,01*         |
|               | Parietal Inferior R        | 2,37*         |
|               | Parietal Superior R        | 1,76          |

\* = Cortical thickness comparison significant after AlphaSim threshold correction.  
 Remaining areas were not significant after correction and are reported as trend.  
 doi:10.1371/journal.pone.0064222.t003

### Cognitive analysis

PD-MCI showed deficits in PM47 ( $p < 0.01$ ), TMT-A ( $p < 0.05$ ), phonological and semantic fluency task ( $p < 0.5$  and  $p < 0.01$  respectively), ROCF copy and immediate recall ( $p < 0.001$  and  $p < 0.01$ ), Stroop Color/Word Interference Test (time and error) ( $p < 0.1$  for both), FAB ( $p < 0.01$ ), Digit Span backward ( $p < 0.02$ ) and CDT ( $p < 0.01$ ). No differences were observed in BDI-II score between PD-CNT and PD-MCI. No PD patient reported hallucinations. Person's analysis showed significant correlations between PM47 and inferior temporal areas ( $p = 0.04$ ), temporal pole ( $p = 0.04$ ) and middle occipital areas ( $p = 0.04$ ) in the left hemisphere. We also found that ROCF (copy and immediate recall) correlated with inferior temporal ( $p = 0.01$ ), middle temporal ( $p = 0.03$ ) and middle occipital areas ( $p = 0.02$ ) in the left hemisphere, precuneus ( $p = 0.001$ ) and superior orbito-frontal areas ( $p = 0.04$ ) in the right hemisphere. Moreover a significant correlation was also observed between performance at the Stroop Color/Word Interference Test and precuneus ( $p = 0.01$ ), paracentral lobe ( $p = 0.01$ ), inferior parietal areas ( $p = 0.01$ ) and superior

frontal areas ( $p = 0.004$ ) in the right and in the left middle-occipital areas ( $p = 0.02$ ).

### Discussion

We found significant cortical thinning in the right occipital-parietal, in the middle frontal areas, in the right cuneus as well as volume reductions in the putamen bilaterally, in the left accumbens, in the right caudate and pallidum, in the right hippocampus and amigdale in PD patients compared with HC. These results underlie the presence of structural changes in PD patients at relatively early stage and support previous studies showing cortical thinning and atrophy in the neocortex and subcortical regions [36–49,10,12,13,40,41]. However none of these studies investigated structural changes specifically in PD-MCI patients, and those comparing PD vs. HC have several limitations. In particular, one study used a larger sample than our (49 PD, 33 HC) but the authors did not perform an adequate cognitive battery [42]. Other two studies included a comprehensive neuropsychological evaluation but the whole PD sample was very small (15 PD and 15 HC) and neither MCI diagnosis [37] nor different MCI criteria [43] were applied [44]. Our study, so far, is the first to evaluate the cortico-morphometric pattern in a PD cohort including PD-MCI, diagnosed according with the most recent criteria [27], and investigating its association with cognitive profile.

Our PD-MCI patients showed significant regional thickening in right parietal-frontal areas and in left temporal-occipital areas relative to PD-CNT. Notably cortical thickening observed in PD-MCI vs. PD-CNT should be considered in the context of a general cortical thinning of PD when compared to HC.

Cortical thickness changes in PD-MCI may result from the action of complex mechanisms associated with plasticity and neuronal reorganization. Analysis of cognitive data in PD-MCI and their anatomical correlate may help understanding the nature of these mechanisms. PD-MCI showed specific cognitive impairments in attention-executive, visual-spatial and memory domains when compared with PD-CNT. These findings confirm the presence of heterogeneous cognitive abnormalities in PD-MCI and underlay the presence of posterior in addition to frontal cognitive deficits [2,45,5].

**Table 4.** Subcortical volume comparisons between PD and HC.

| Regions                   | PD (Mean +/-Std mm <sup>3</sup> ) | HC (Mean +/-Std mm <sup>3</sup> ) | P-value |
|---------------------------|-----------------------------------|-----------------------------------|---------|
| Left Hemisphere           |                                   |                                   |         |
| Putamen                   | 4544,52±570,74                    | 4862,1±477,14                     | 0,031   |
| Accumbens area            | 484,28±70,9                       | 548,1±62,11                       | 0,020   |
| Right Hemisphere          |                                   |                                   |         |
| Global Cortical Thickness | 2,28±0,17                         | 2,39±0,18                         | 0,009   |
| Caudate                   | 2971,52±229,59                    | 3204,67±388,35                    | 0,016   |
| Putamen                   | 4506,93±608,64                    | 4932,38±608,41                    | 0,020   |
| Pallidum                  | 1462,76±165,86                    | 1582,14±236,34                    | 0,055   |
| Hippocampus               | 4083,31±458,11                    | 4414,24±352,23                    | 0,002*  |
| Amygdala                  | 1524,48±163,55                    | 1742,38±174,45                    | 0,000*  |
| Accumbens area            | 467,62±72,48                      | 538,1±73,96                       | 0,003*  |

\* = Comparisons significant after Bonferroni correction.  
 Remaining areas were not significant after correction and are reported as trend.  
 doi:10.1371/journal.pone.0064222.t004

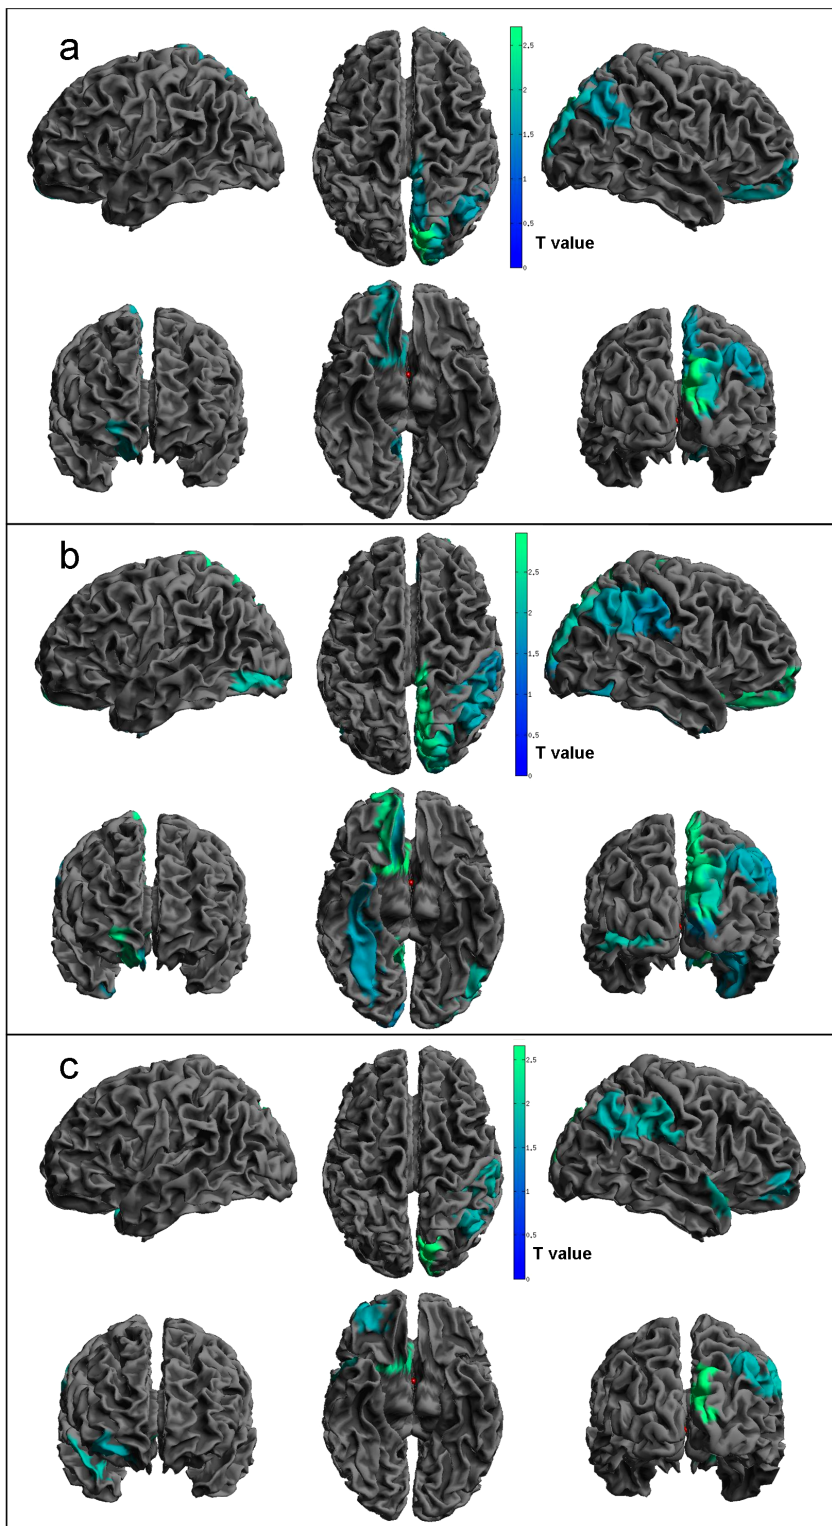

**Figure 1. Regions of significant cortical thinning.** Statistical threshold used  $T = 1.69$ ,  $p < 0.05$ . Panel a) PD vs. HC contrast; b) PD-CNT vs. HC; c) PD-MCI vs. HC.  
doi:10.1371/journal.pone.0064222.g001

Correlation analysis revealed interesting structural-cognitive patterns of brain function and, more specifically, cortical thickening in areas involved in functional activities relevant for accomplishing tasks impaired in PD-MCI. Indeed, tasks such as

PM47 involving visual-recognition and spatial assessment were associated with thickening of temporal areas and inferior occipital area. A functional MRI (fMRI) study found middle temporal lobe (MTL) activation during visual recognition task and additional

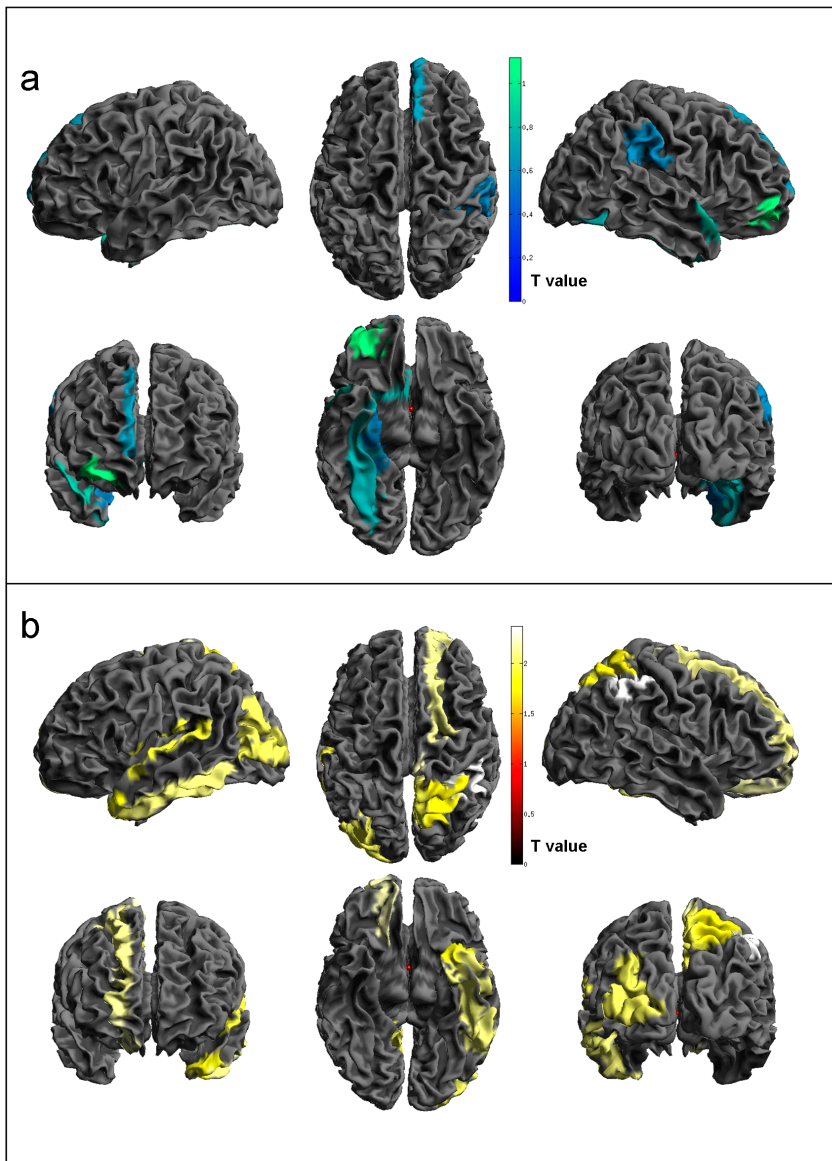

**Figure 2. Regions of significant cortical thickness changes in PD-MCI vs. PD-CNT.** Panel a) PD-MCI atrophy; b) PD-MCI hypertrophy. Statistical threshold used  $T = 1.69$ ,  $p < 0.05$ . doi:10.1371/journal.pone.0064222.g002

occipital areas activation in non-PD subjects with MCI vs. HC. They explained these results as plastic brain reorganization in patients with medial temporal lobe damage [46]. Moreover visuo-spatial and visuo-perceptual (ROCF and Stroop Color/Word Interference Test) tasks correlated with left temporal inferior lobe and occipital middle areas as well as right precuneus and superior frontal areas thickening. There is evidence indicating that occipito-temporal and occipito-parietal pathways project to the prefrontal cortex and play a role in maintaining visuo-spatial information and object “on-line” [47]. fMRI studies showed that Stroop-like tasks activate fronto-parietal neural networks [48,49]. Interestingly Kaufmann L. et al. [50] observed stronger and more extensive activation in individuals with MCI in fronto-parietal and occipital regions during Stroop Color/Word Interference Test reflecting more effortful information retrieval. Indeed, in our analysis we found anatomical correlates for a number of tests that exceeded those abnormal in PD-MCI. We believe that discrete brain areas

are not univocally associated with a specific cognitive test but operate in the context of larger networks. This is in line with the concept that the same area can be functionally linked with different cognitive skills. Finally, fMRI data as well as our findings point to plasticity and reorganization of the non-motor system in PD-MCI, a condition that may herald dementia. We acknowledge that activation studies reflect changes in the extension of areas involved in specific tasks and not necessarily express variation in thickening. Although a strong correlation between hypometabolism and gray matter atrophy may be observed in presence of dementia [51], findings in non-PD MCI are inconsistent [52–55] and suggest a more complex relationship between grey matter atrophy and functional alterations. It is conceivable that to preserve cognitive skills, additional and/or compensatory brain areas “come into help” (which would result in relative hyperactivity or thickening) in cognitively demanding conditions trying to preserve a relative “cognitive stability”. These compensatory

mechanisms may act only temporarily and herald, as disease progresses, a subsequent cognitive decline [56,57]. Literature evidence shows paradoxical perfusion increases in patients at risk for AD (genetic risk, family history, MCI) and decreases in task related-fMRI activity in more cognitively impaired subjects [58,59] suggesting a non-linear progression [60]. According to this non-linear hypothesis we would expect that cognitive severity is a modulating factor of neuronal responsivity. PD-MCI patients may initially exhibit hyper-activation or thickening in task-relevant brain structures reflecting compensatory mechanisms, while as cognitive abnormalities progress to dementia hypo-activation or thinning would develop.

We acknowledge that our data regard a relatively small number of patients and should be considered in the context of current MCI definition. The prevalence of PD-MCI is influenced by both the neuropsychological tools and cut-offs chosen to define cognitive impairment as clinically relevant [61,62] as well as the definition of MCI itself, which is still debated [63]. We adopted the most recent criteria for PD-MCI based on statistical criteria ( $\leq 1.5$  SD Z-score below the population's mean in at least two tests for the same cognitive domain or one test in at least two different domains) in an attempt to minimize the possibility of false negative but

recognize that such criteria are not clinical and for this reason may affect sampling and results. However, it should be noted that there were areas that survived even after the multiple comparison correction, leading us to reject the idea of cortical thickness alteration in PD-MCI due to a type error I.

Although cortical thickness has been showed to have high sensitivity and specificity in detecting with more accuracy structural alteration change even at individual level [32], we believe this MRI methodology, is not sufficient to define the nature of cortical thickening found in our PD-MCI. Future studies using larger samples and including additional clinical and neuroimaging measurement (i.e. Diffusion Tensor Imaging) will be needed to further explore the complex relationship between cognitive phenotype, neuronal reorganization and structural degeneration and particularly in determining the evolution of this pattern of cortical abnormalities in PD-MCI.

## Author Contributions

Conceived and designed the experiments: RB AA MC PG. Performed the experiments: RB SF. Analyzed the data: LW RB. Contributed reagents/materials/analysis tools: LW MC GR. Wrote the paper: BR.

## References

- Owen AM (2004) Cognitive dysfunction in Parkinson's disease: the role of frontostriatal circuitry. *Neuroscientist* 10 (6): 525–37.
- Muslimovic D, Post B, Speelman JD, Schmand B (2005) Cognitive profile of patients with newly diagnosed Parkinson disease. *Neurology* 65 (8): 1239–45.
- Pereira JB, Junqué C, Martí MJ, Ramirez-Ruiz B, Bargalló N, et al. (2009) Neuroanatomical substrate of visuospatial and visuo-perceptual impairment in Parkinson's disease. *E.Mov Disord* 24 (8):1193–9.
- Lyoo CH, Ryu YH, Lee MS (2010) Topographical distribution of cerebral cortical thinning in patients with mild Parkinson's disease without dementia. *Mov Disord* 25 (4):496–9.
- Sollinger AB, Goldstein FC, Lah JJ, Levey AI, Factor SA (2010) Mild cognitive impairment in Parkinson's disease: subtypes and motor characteristics. *Parkinsonism Relat Disord* 16 (3):177–80.
- Nobili F, Campus C, Arnaldi D, De Carli F, Cabassi G, et al. (2010) Cognitive-nigrostriatal relationships in de novo, drug-naïve Parkinson's disease patients: a [I-123]FP-CIT SPECT study. *Mov Disord* 25 (1):35–43.
- Monchi O, Petrides M, Doyon J, Postuma RB, Worsley K, et al. (2004) Neural bases of set-shifting deficits in Parkinson's disease. *J Neurosci* 24 (3):702–10.
- Huang C, Mattis P, Tang C, Perrine K, Carbon M, et al. (2007) Metabolic brain networks associated with cognitive function in Parkinson's disease. *Neuroimage* 34 (2):714–23.
- Ibarretxe-Bilbao N, Ramirez-Ruiz B, Tolosa E, Martí MJ, Valldeoriola F, et al. (2008) Hippocampal head atrophy predominance in Parkinson's disease with hallucinations and with dementia. *J Neurol* 255 (9):1324–31.
- Summerfield C, Junqué C, Tolosa E, Salgado-Pineda P, Gómez-Ansón B, et al. (2005) Structural brain changes in Parkinson disease with dementia: a voxel-based morphometry study. *Arch Neurol* 62 (2):281–5.
- Nagano-Saito A, Washimi Y, Arahata Y, Kachi T, Lerch JP, et al. (2005) Cerebral atrophy and its relation to cognitive impairment in Parkinson disease. *Neurology* 64 (2):224–9.
- Burton EJ, McKeith IG, Burn DJ, Williams ED, O'Brien JT (2004) Cerebral atrophy in Parkinson's disease with and without dementia: a comparison with Alzheimer's disease, dementia with Lewy bodies and controls. *Brain* 127 (Pt 4): 791–800.
- Biundo R, Formento-Dojot P, Facchini S, Vallenga A, Ghezzi L, et al. (2011). Brain volume changes in Parkinson's disease and their relationship with cognitive and behavioural abnormalities. *J Neurol Sci* 15;310(1–2):64–9.
- Fischl B, Dale AM (2000) Measuring the thickness of the human cerebral cortex from magnetic resonance images. *Proc Natl Acad Sci U S A* 97 (20): 11050–5.
- Hughes AJ, Daniel SE, Kilford L, Lees AJ (1992) Accuracy of clinical diagnosis of idiopathic Parkinson's disease: a clinico-pathological study of 100 cases. *J Neurol Neurosurg Psychiatry* 55 (3): 181–4.
- Emre M, Aarsland D, Brown R, Burn DJ, Duyckaerts C, et al. (2007) Clinical diagnostic criteria for dementia associated with Parkinson's disease. *Mov Disord* 22 (12): 1689–707.
- Tomlinson CL, Stowe R, Patel S, Rick C, Gray R, et al. (2010) Systematic review of levodopa dose equivalency reporting in Parkinson's disease. *Mov Disord* 25 (15): 2649–85.
- Folstein MF, Folstein SE, McHugh PR (1975) "Mini-mental state". A practical method for grading the cognitive state of patients for the clinician. *J Psychiatr Res* 12 (3): 189–98.
- Appollonio I, Leone M, Isella V, Piamarta F, Conzoli T, et al. (2005) The Frontal Assessment Battery (FAB): normative values in an Italian population sample. *Neurological Science* 26(2): 108–116.
- Baldo JV, Schwartz S, Wilkins D, Dronkers NF (2006) Role of frontal versus temporal cortex in verbal fluency as revealed by voxel-based lesion symptom mapping. *J Int Neuropsychol Soc* 12(6):896–900.
- Novelli G, Papagno C, Capitani E, Laiacona M, Vallar G, et al. (1986) Tre test clinici di ricerca e produzione lessicale: taratura su soggetti normali. *Archo Psicol. Neurol. Psichiat* 47: 477–506.
- Spinnler H, Tognoni G (1987) Standardizzazione e taratura italiana di test neuropsicologici. *Italian Journal of Neurological Sciences* 6 (8): 1–120.
- Caffarra P, Vezzadini G, Dieci F, Zonato F, Venneri A (2002) Rey-Osterrieth complex figure: normative values in an Italian population sample. *Neurol Sci* 22: 443–447.
- Caffarra P, Vezzadini G, Dieci F, Zonato F, Venneri A (2002) Una versione abbreviata del test di Stroop. Dati normativi nella popolazione italiana. *Nuova Rivista di Neurologia* 12 : 111–115.
- Giovagnoli AR, Del Pesce M, Mascheroni S, Simoncelli M, Laiacona M, et al. (1996) Trail Making Test: normative values from 287 normal adult controls. *The Italian journal of neurological sciences* 17 (4): 305–309
- Caffarra P, Gardini S, Zonato F, Concaro L, Dieci F, et al. (2011) Italian norms for the Freedman version of the Clock Drawing Test. *J Clin Exp Neuropsychol* 33 (9): 982–8.
- Litvan I, Goldman JG, Tröster AI, Schmand BA, Weintraub D, et al. (2012) Diagnostic criteria for mild cognitive impairment in Parkinson's disease: Movement Disorder Society Task Force guidelines. *Mov Disord* 27 (3): 349–56.
- Fischl B (2012) FreeSurfer. *Neuroimage* 62 (2): 774–81.
- Fischl B, Sereno MI, Dale AM (1999) Cortical surface-based analysis. II: Inflation, flattening, and a surface-based coordinate system. *Neuroimage* 9: 195–207.
- Fischl B, Dale AM (2000) Measuring the thickness of the human cerebral cortex from magnetic resonance images. *Proc Natl Acad Sci U S A* 97: 11050–11055.
- Dale AM, Fischl B, Sereno MI (1999) Cortical surface-based analysis. I. Segmentation and surface reconstruction. *Neuroimage* 9: 179–194.
- Desikan RS, Segonne F, Fischl B, Quinn BT, Dickerson BC, et al. (2006) An automated labeling system for subdividing the human cerebral cortex on MRI scans into gyral based regions of interest. *Neuroimage* 31: 968–980.
- Destrieux C, Fischl B, Dale A, Halgren E (2010) Automatic parcellation of human cortical gyri and sulci using standard anatomical nomenclature. *Neuroimage* 53(1):1–15.
- Li G, Nie J, Wu G, Wang Y, Shen D (2012) Consistent reconstruction of cortical surfaces from longitudinal brain MR images. *Neuroimage* 59: 3805–3820
- Cox RW (1996) AFNI: software for analysis and visualization of functional magnetic resonance neuroimages. *Comput Biomed Res* 29: 162–173.
- Jubault T, Gagnon JF, Karama S, Pito A, Lafontaine AL, et al. (2011) Patterns of cortical thickness and surface area in early Parkinson's disease. *Neuroimage* 55 (2):462–7.
- Tinaz S, Courtney MG, Stern CE (2011) Focal cortical and subcortical atrophy in early Parkinson's disease. *Mov Disord* 26 (3):436–41.
- Pereira JB, Ibarretxe-Bilbao N, Martí MJ, Compta Y, Junqué C, et al. (2012) Assessment of cortical degeneration in patients with Parkinson's disease by voxel-

- based morphometry, cortical folding, and cortical thickness. *Hum Brain Mapp* 33 (11): 2521–34.
39. Geng DY, Li YX, Zee CS (2006) Magnetic resonance imaging-based volumetric analysis of basal ganglia nuclei and substantia nigra in patients with Parkinson's disease. *Neurosurgery* 58(2):256–62.
  40. Nishio Y, Hirayama K, Takeda A, Hosokai Y, Ishioka T, et al. (2010) Corticolimbic gray matter loss in Parkinson's disease without dementia. *Eur J Neurol* 17 (8):1090–7.
  41. Meyer JS, Huang J, Chowdhury MH (2007) MRI confirms mild cognitive impairments prodromal for Alzheimer's, vascular and Parkinson-Lewy body dementias. *J Neurol Sci* 257 (1–2):97–104.
  42. Monchi O, Stoessel AJ (2012) Imaging neural correlates of mild cognitive impairment in Parkinson's disease. *Lancet Neurol* 11 (8): 653–5.
  43. Petersen RC (2004) Mild cognitive impairment as a diagnostic entity. *J Intern Med* 256(3):183–94.
  44. Pellicano C, Assogna F, Piras F, Caltagirone C, Pontieri FE, et al. (2012) Regional cortical thickness and cognitive functions in non-demented Parkinson's disease patients: a pilot study. *Eur J Neurol* 19 (1): 172–5.
  45. Poletti M, Emre M, Bonuccelli U (2011) Mild cognitive impairment and cognitive reserve in Parkinson's disease. *Parkinsonism Relat Disord* 17 (8): 579–86.
  46. Protzner AB, Mandzia JL, Black SE, McAndrews MP (2011) Network interactions explain effective encoding in the context of medial temporal damage in MCI. *Hum Brain Mapp* 32 (8): 1277–89.
  47. Ungerleider LG, Courtney SM, Haxby JV (1998) A neural system for human visual working memory. *Proc Natl Acad Sci U S A* 95 (3): 883–90.
  48. van Veen V, Carter CS (2005) Separating semantic conflict and response conflict in the Stroop task: a functional MRI study. *Neuroimage* 3: 497–504
  49. Bunge SA, Hazeltine E, Scanlon MD, Rosen AC, Gabrieli JD (2002) Dissociable contributions of prefrontal and parietal cortices to response selection. *Neuroimage* 3:1562–71.
  50. Kaufmann L, Ischebeck A, Weiss E, Koppelstaetter F, Siedentopf C, et al. (2008) An fMRI study of the numerical Stroop task in individuals with and without minimal cognitive impairment. *Cortex* 9: 1248–55.
  51. Villain N, Desgranges B, Viader F, de la Sayette V, Mezenge F, et al. (2008) Relationships between hippocampal atrophy, white matter disruption, and gray matter hypometabolism in Alzheimer's disease. *J Neurosci* 28: 6174–6181
  52. Gili T, Cercignani M, Serra L, Perri R, Giove F, et al. (2011) Regional brain atrophy and functional disconnection across Alzheimer's disease evolution. *J Neurol Neurosurg Psychiatry* 82: 58–66.
  53. Sorg C, Riedl V, Muhlau M, Calhoun VD, Eichele T, et al. (2007) Selective changes of resting-state networks in individuals at risk for Alzheimer's disease. *Proc Natl Acad Sci U S A* 104: 18760–18765.
  54. Chetelat G, Desgranges B, de la Sayette V, Viader F, Berkouk K, et al. (2003) Dissociating atrophy and hypometabolism impact on episodic memory in mild cognitive impairment. *Brain* 126: 1955–1967.
  55. Han Y, Wang J, Zhao Z, Min B, Lu J, et al. (2011) Frequency-dependent changes in the amplitude of low-frequency fluctuations in amnesic mild cognitive impairment: a resting-state fMRI study. *Neuroimage* 55: 287–295.
  56. Celone KA, Calhoun VD, Dickerson BC, Atri A, Chua EF, et al. (2006) Alterations in memory networks in mild cognitive impairment and Alzheimer's disease: an independent component analysis. *J Neurosci* 26 (40):10222–31.
  57. Hämäläinen A, Pihlajamäki M, Tanila H, Hänninen T, Niskanen E, et al. (2007) Increased fMRI responses during encoding in mild cognitive impairment. *Neurobiol Aging* 12 :1889–903.
  58. Bookheimer SY, Strojwas MH, Cohen MS, Saunders AM, Pericak-Vance MA, et al. (2000) Patterns of brain activation in people at risk for Alzheimer's disease. *N Engl J Med* 343 (7):450–6.
  59. Bassett SS, Yousem DM, Cristinzio C, Kusevic I, Yassa MA, et al. (2006) Familial risk for Alzheimer's disease alters fMRI activation patterns. *Brain* 129 (Pt 5): 1229–39.
  60. Aarsland D, Muniz G, Matthews F (2011) Nonlinear decline of mini-mental state examination in Parkinson's disease. *Mov Disord* 26(2):334–7
  61. Martínez-Horta S, Kulisevsky J (2011) Is all cognitive impairment in Parkinson's disease “mild cognitive impairment”? *J Neural Transm* 118(8):1185–90.
  62. Biundo R, Weis L, Pilleri M, Facchini S, Formento-Dojot P, et al. (2013) Diagnostic and screening power of neuropsychological testing in detecting mild cognitive impairment in Parkinson's disease. *J Neural Transm* 120(4):627–33.
  63. Tröster AI (2008) Neuropsychological characteristics of dementia with Lewy bodies and Parkinson's disease with dementia: differentiation, early detection, and implications for “mild cognitive impairment” and biomarkers. *Neuropsychol Rev* 18(1):103–19.
